# Supplementary material for: Multi-omics analysis reveals the key factors involved in the severity of the Alzheimer’s disease
Source: PubMed Central journal article supplement (PMC11448018; doi:10.1186/s13195-024-01578-6), 2024-10-02

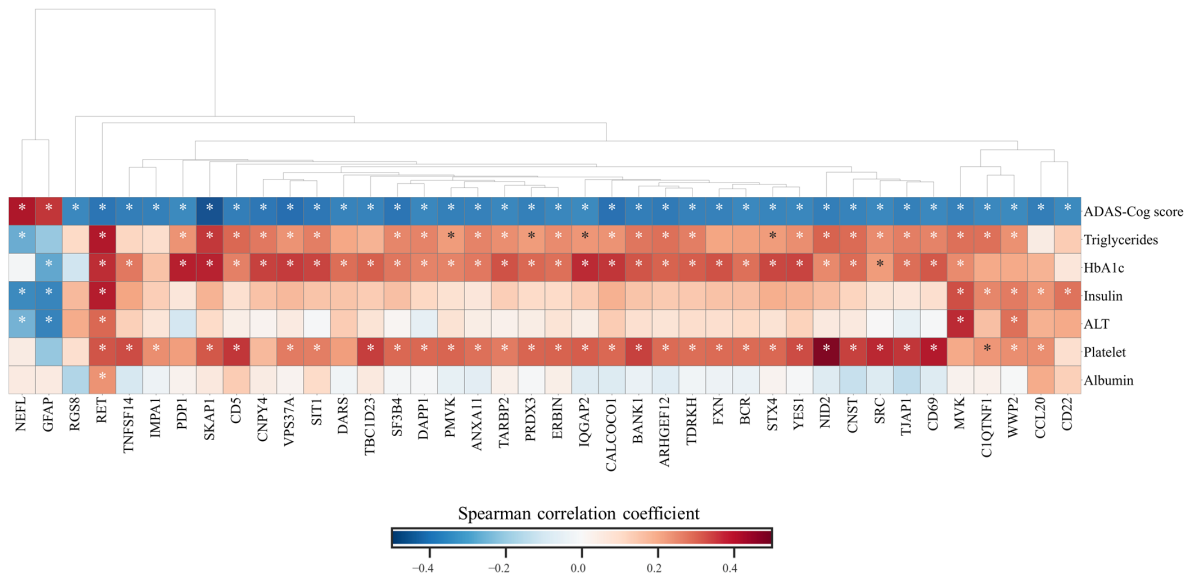

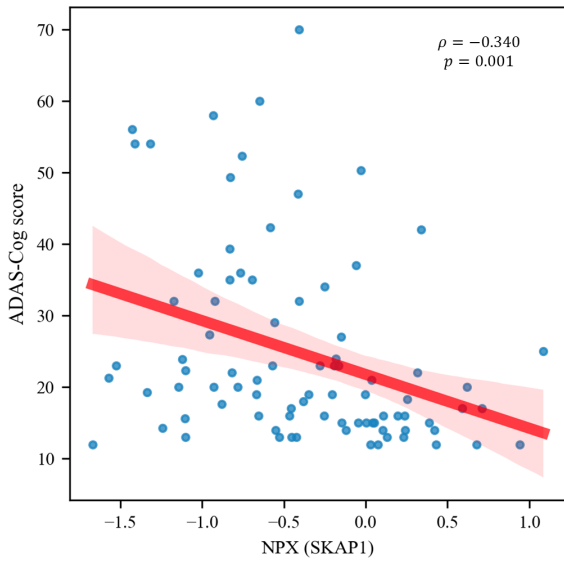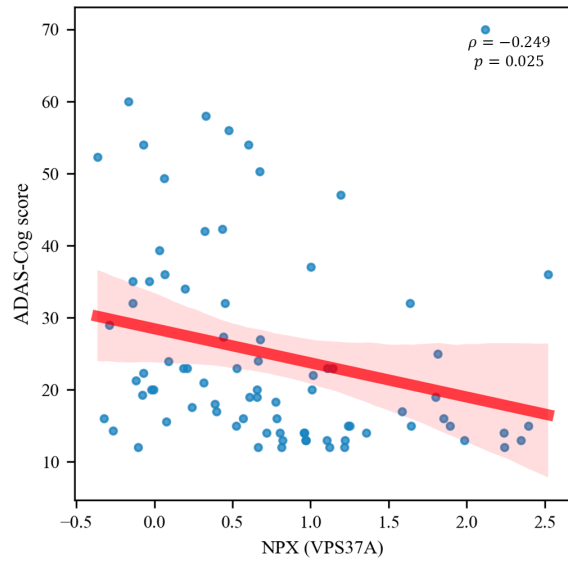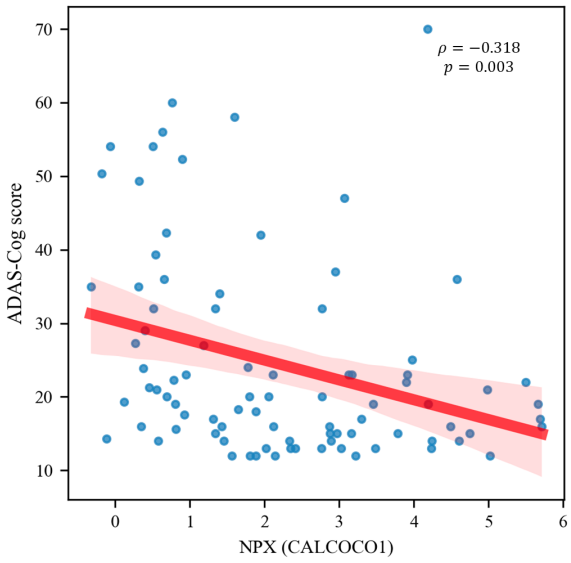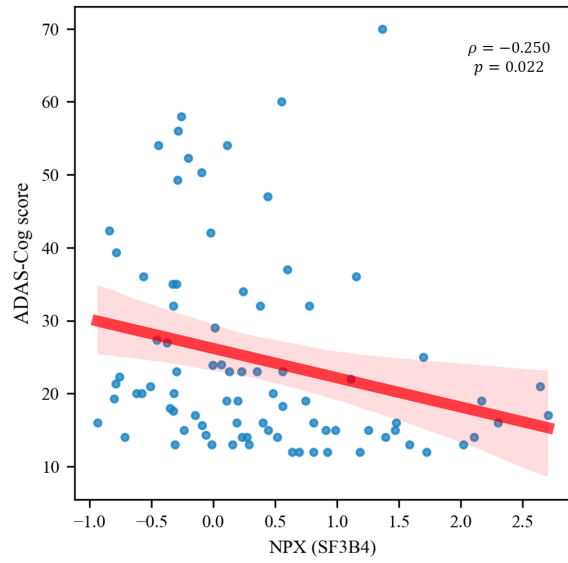

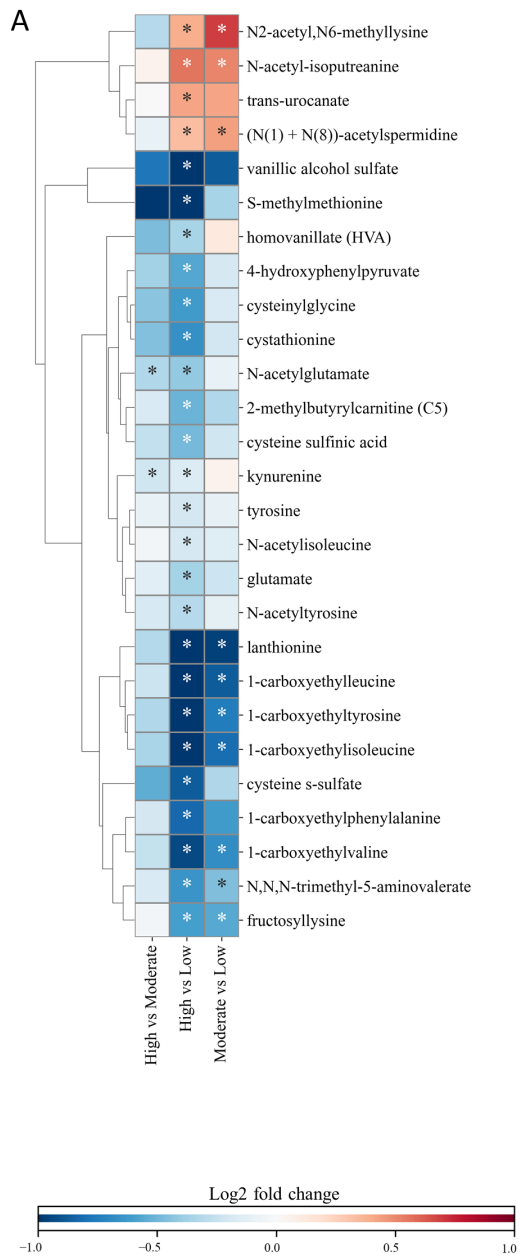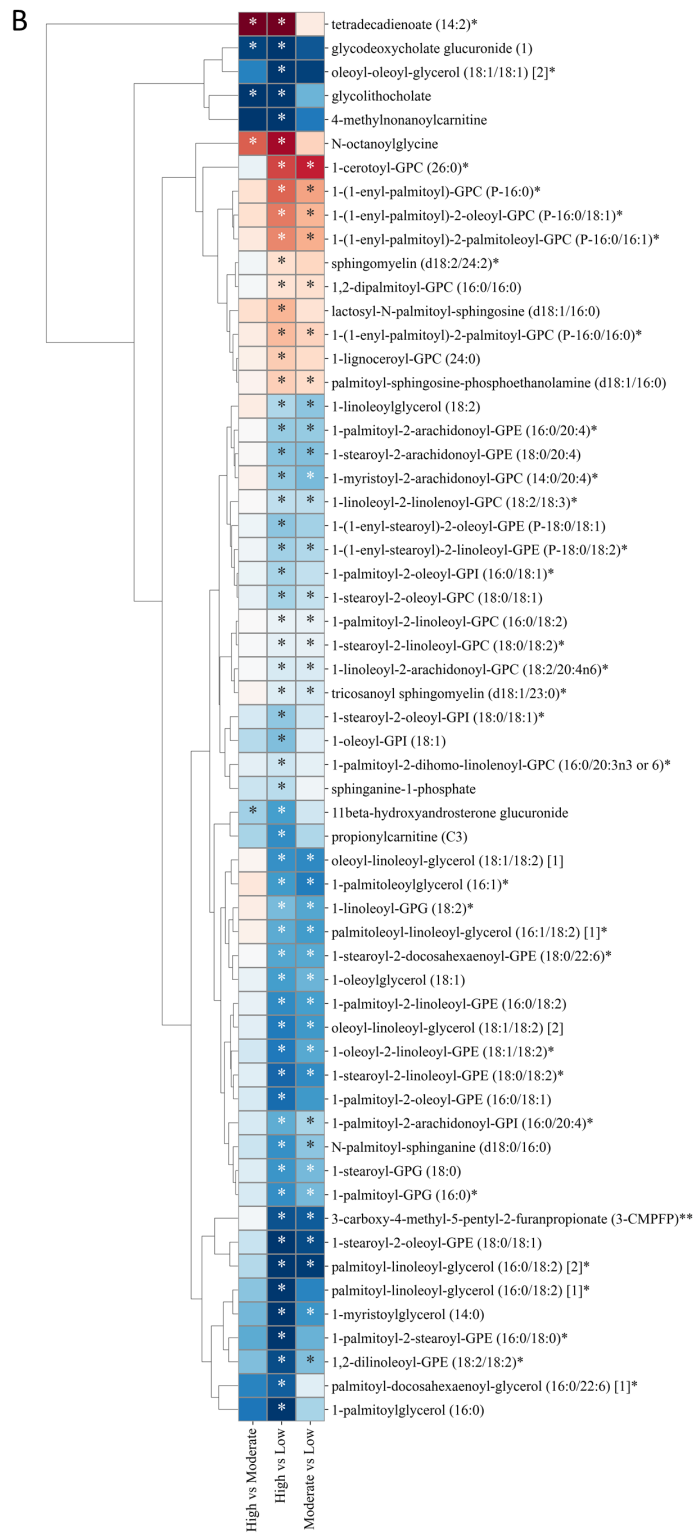

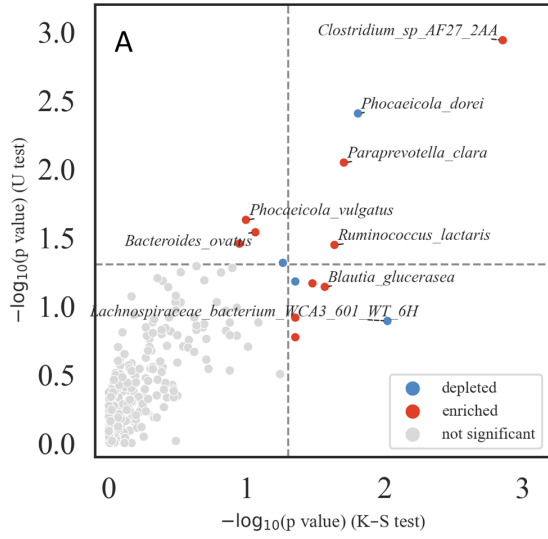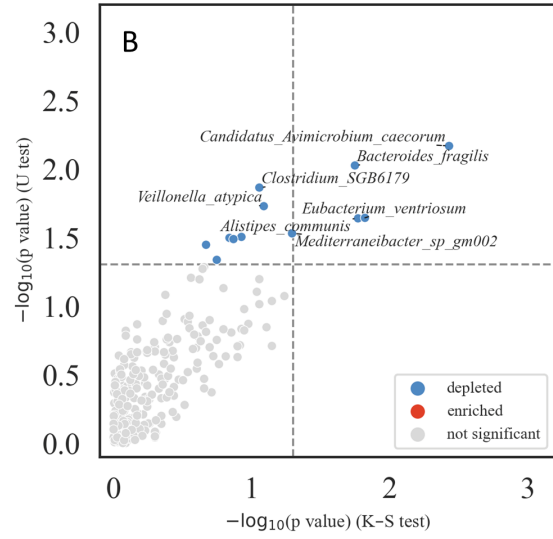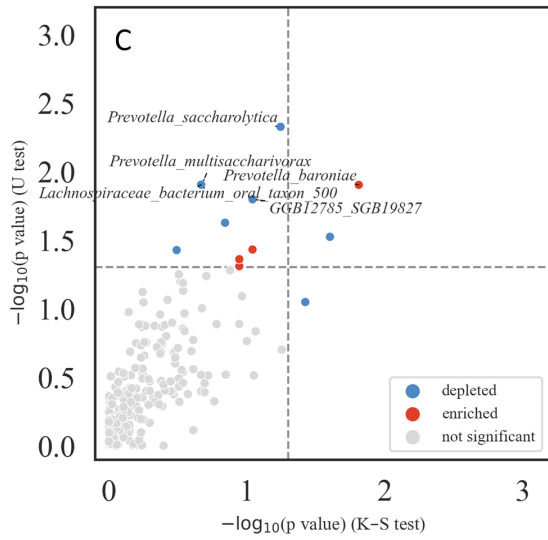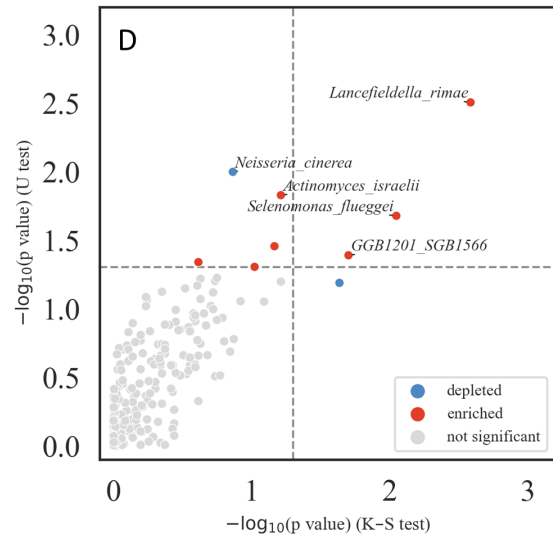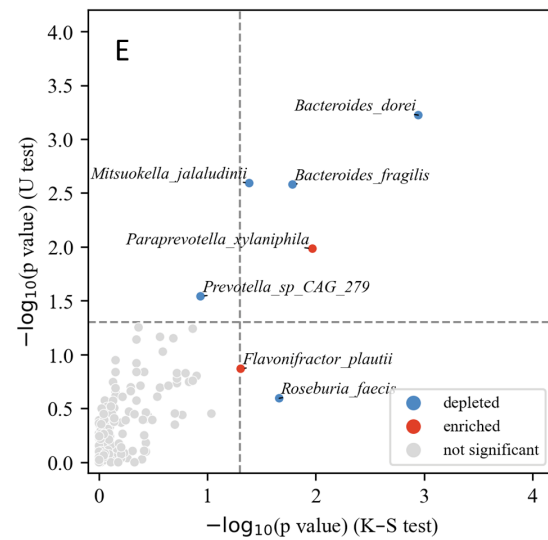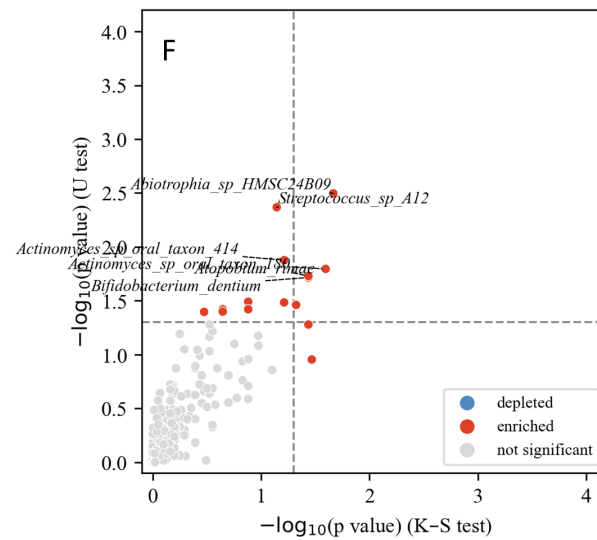

A

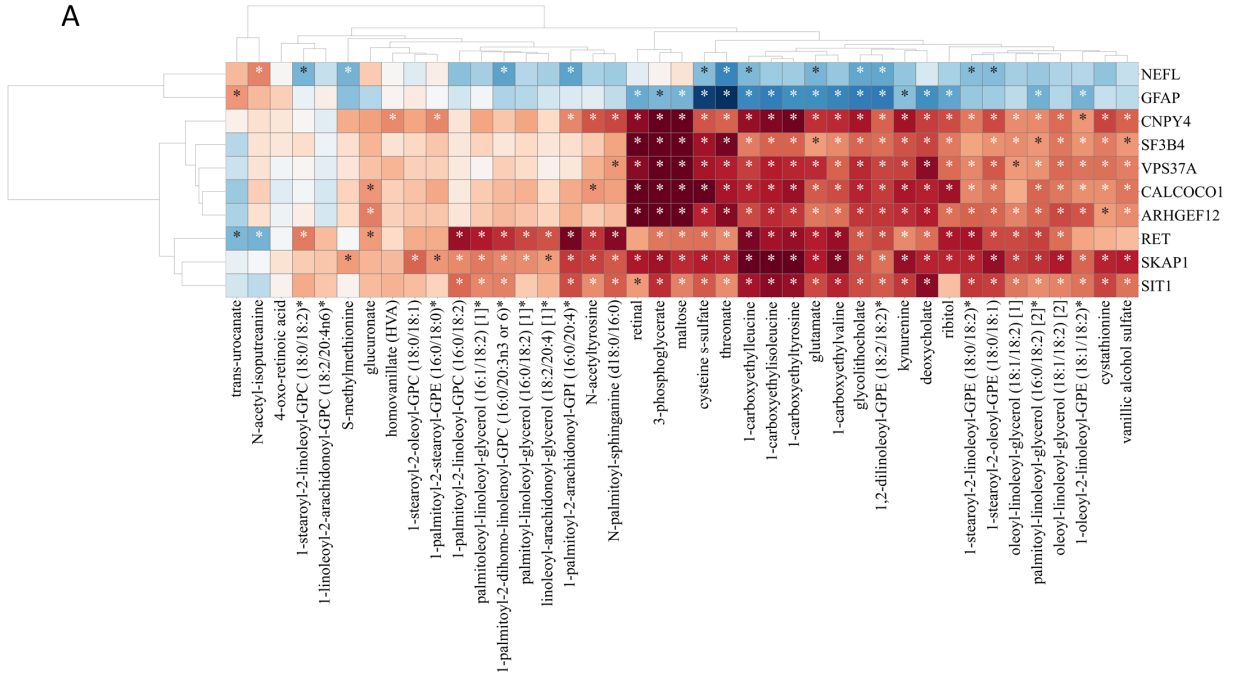

B

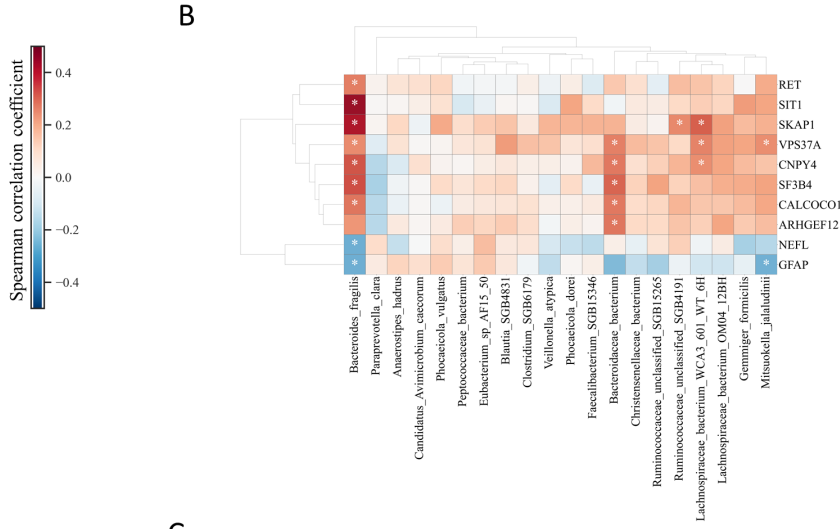

C

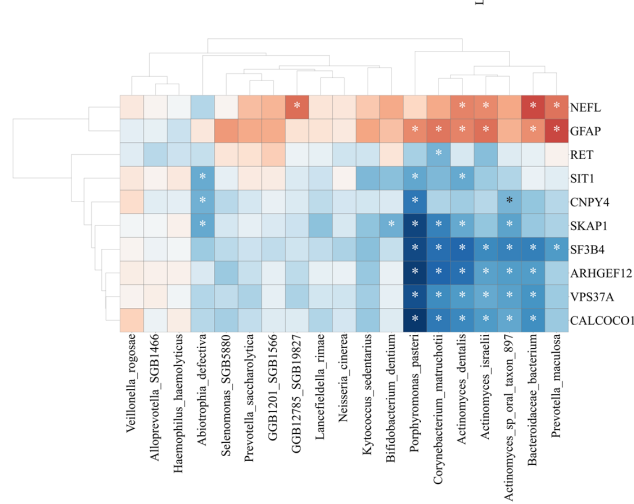

D

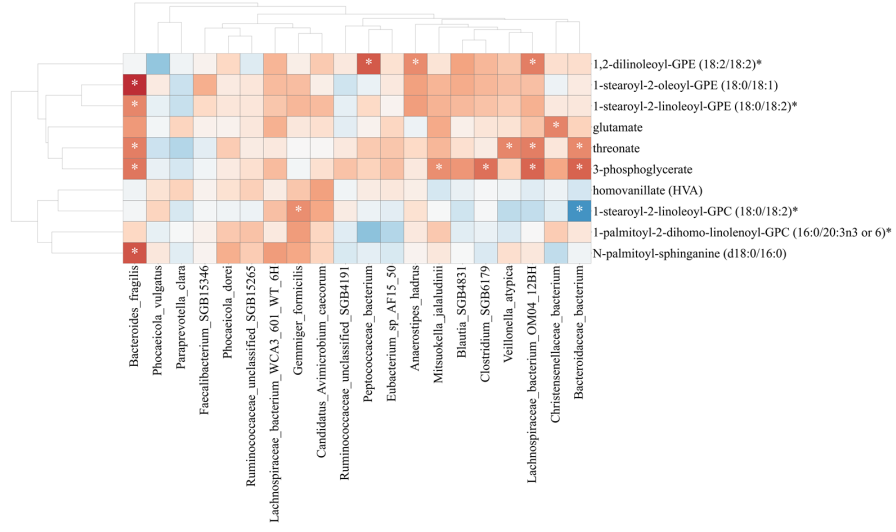

E

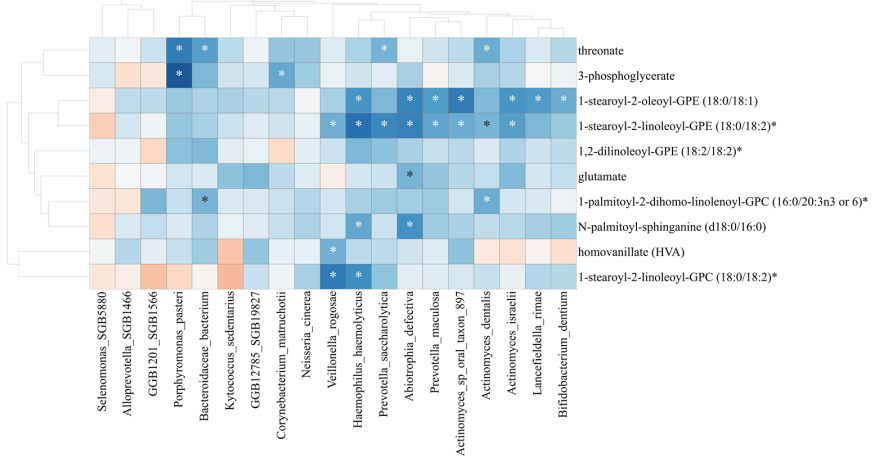

F

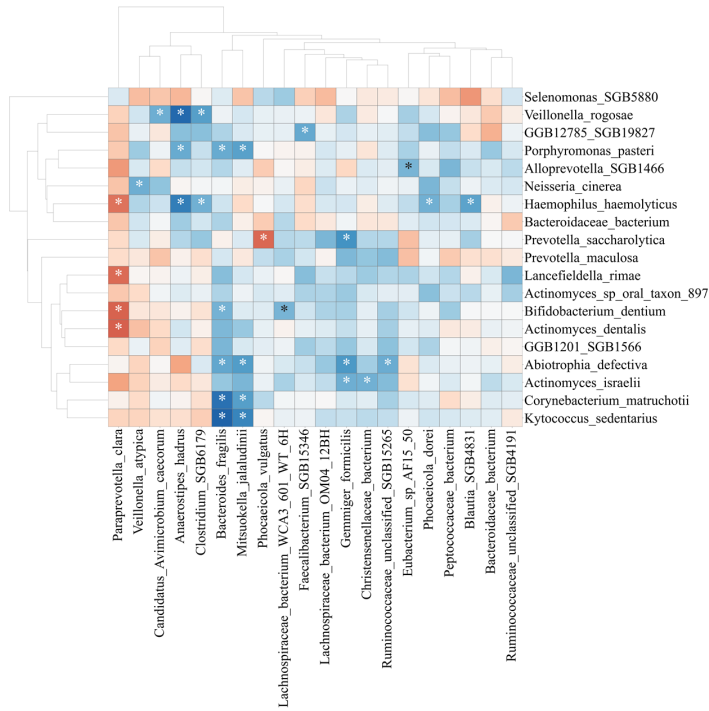

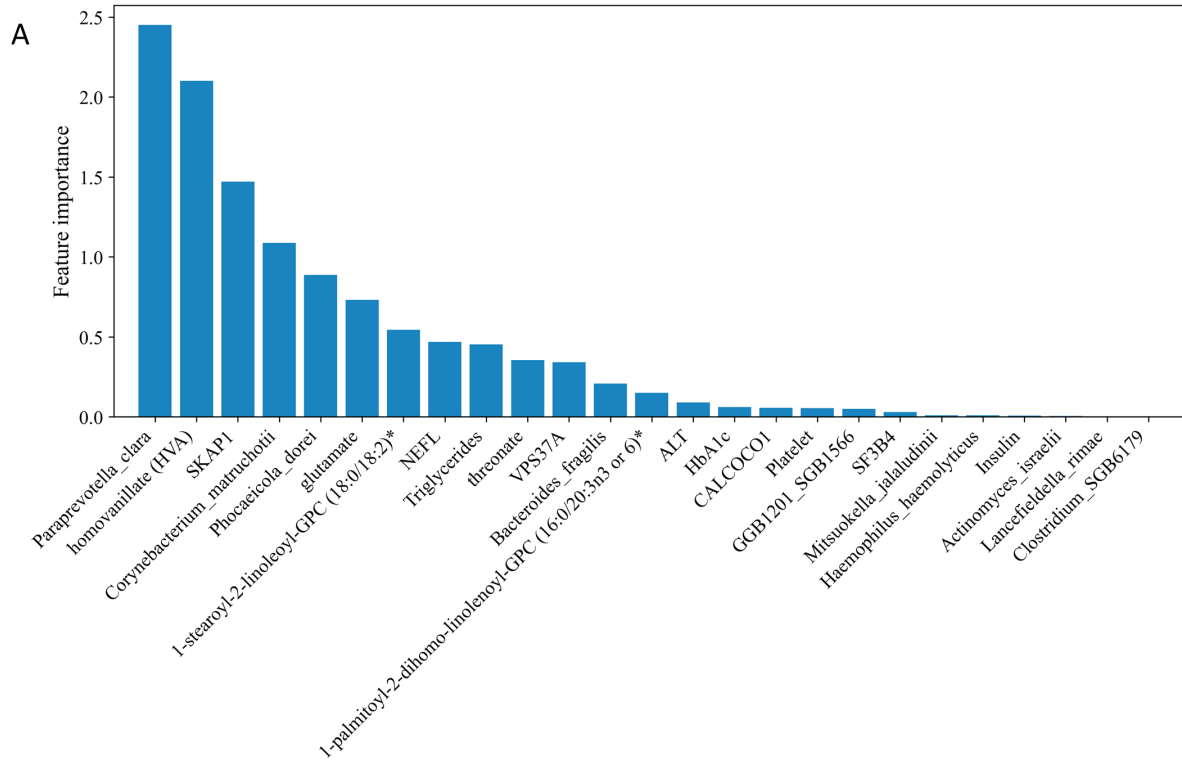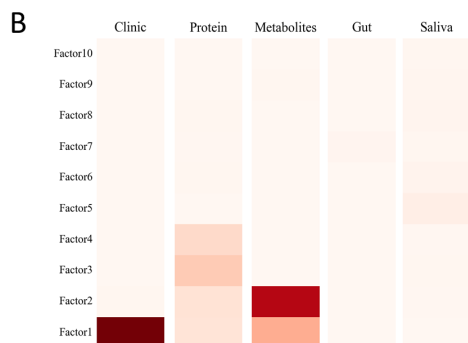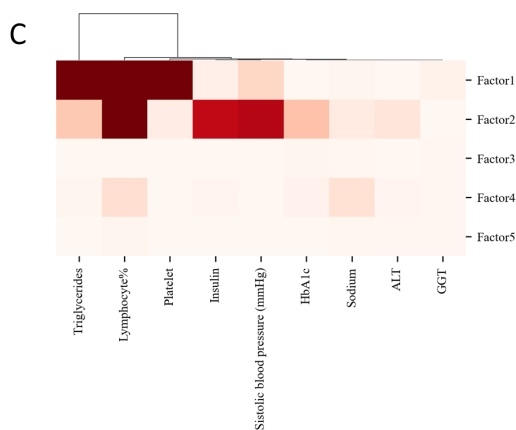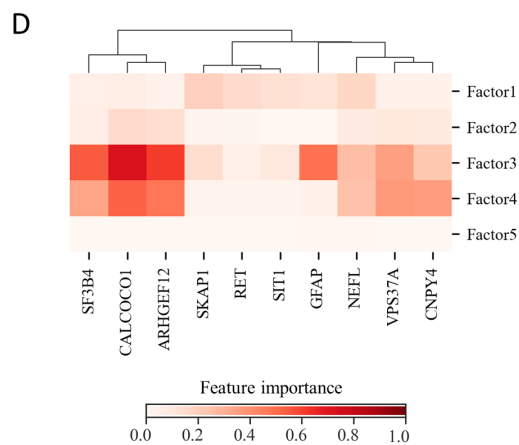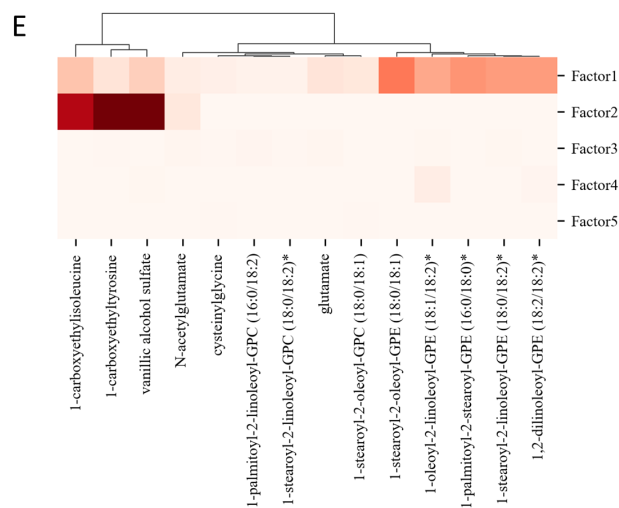

Supplement: 13195_2024_1578_MOESM1_ESM.pdf [file 13195_2024_1578_MOESM1_ESM.pdf]
